# Supplementary material
Source: publisher figshare collection journal article supplement (https://sage.figshare.com/ndownloader/files/15017267)
Supplement: Supplementary file 1 [file 15017267]

## Supplementary File: Tables of Empirical Studies Included in Literature Review

### Qualitative

| <b><i>Study</i></b>                 | <b><i>Population</i></b>                                                                                                                                                                                               | <b><i>Methods</i></b>                                                                 |
|-------------------------------------|------------------------------------------------------------------------------------------------------------------------------------------------------------------------------------------------------------------------|---------------------------------------------------------------------------------------|
| 1. Bajwah <i>et al.</i> (2012)      | 8 patients with ILD, 4 informal carers and 6 HCPs from two specialist ILD clinics in London. The HCPs were a mixture of generalist and specialist palliative care providers and specialist respiratory care providers. | Semi-structured interviews.                                                           |
| 2. Bajwah <i>et al.</i> (2013)      | 8 patients with ILD, 4 informal carers and 6 HCPs from two specialist ILD clinics in London. The HCPs were a mixture of generalist and specialist palliative care providers and specialist respiratory care providers. | Semi-structured interviews.                                                           |
| 3. Cawley <i>et al.</i> (2014)      | 21 patients with COPD, 13 family carers and 18 HCPs (generalists and respiratory professionals). Primary and secondary care setting of three regions of Scotland.                                                      | Longitudinal in-depth interviews (4 time points)                                      |
| 4. Crawford <i>et al.</i> (2013a)   | 15 patients with severe COPD, their carer and healthcare professionals in Australia                                                                                                                                    | Focus groups with HCPs and semi-structured interviews with patients and carers        |
| 5. Crawford (2010)                  | 7 respiratory healthcare professionals in London.                                                                                                                                                                      | Phenomenological approach, semi-structured interviews                                 |
| 6. Curtis <i>et al.</i> (2008)      | Patients with COPD (n=24), cancer (n=30), COPD and cancer (n=1), their family (n=36) and HCPs (n=56) in the USA.                                                                                                       | Interviews                                                                            |
| 7. Ek <i>et al.</i> (2015)          | 13 bereaved carers of patients with COPD in Sweden. Recruited from a pulmonary clinic.                                                                                                                                 | Semi-structured interviews                                                            |
| 8. Ek and Ternstedt (2008)          | 8 patients with advanced COPD. Recruited from two pulmonary clinics in Sweden.                                                                                                                                         | Semi-structured interviews. Phenomenological approach.                                |
| 9. Epiphaniou <i>et al.</i> (2014)  | 7 patients with advanced COPD, 9 patients with lung cancer and 2 patients with COPD and lung cancer were recruited from 3 respiratory outpatient clinics at a large UK hospital.                                       | A qualitative longitudinal study involving in-depth serial semi-structured interviews |
| 10. Fitzsimons <i>et al.</i> (2007) | 6 patients with respiratory failure, 6 patients with renal failure and 6 patients with heart failure. 17 significant others and a focus group with 18 HCPs. Set in a regional hospital in Northern Ireland.            | Semi-structured interviews and focus groups were employed.                            |
| 11. Gardiner <i>et al.</i> (2009)   | 21 patients with moderate or severe COPD. From 3 GP practices across two areas in the UK.                                                                                                                              | Semi-structured interviews                                                            |
| 12. Gott <i>et al.</i> 2009         | Five focus groups with 39 healthcare professionals involved in care of patients with COPD. 3 focus groups at GP surgeries and 2 at large hospitals. All in the UK.                                                     | Focus Groups                                                                          |
| 13. Gysels and Higginson (2008)     | 18 patients with advanced COPD from a large hospital in the UK. Experiencing problems with breathlessness.                                                                                                             | Semi-structured interviews                                                            |

|                                      |                                                                                                                                                                                               |                                                                                                                     |
|--------------------------------------|-----------------------------------------------------------------------------------------------------------------------------------------------------------------------------------------------|---------------------------------------------------------------------------------------------------------------------|
| 14. Habraken <i>et al.</i> (2008)    | 11 patients with advanced COPD from 5 hospitals in the Netherlands.                                                                                                                           | Semi-structured interviews                                                                                          |
| 15. Hasson <i>et al.</i> (2009)      | 9 carers who had been bereaved 6 to 24 months from caring for a patient with COPD in Northern Ireland                                                                                         | Semi-structured interviews                                                                                          |
| 16. Hasson <i>et al.</i> (2008)      | 13 patients with advanced COPD from Northern Ireland                                                                                                                                          | Semi-structured interviews                                                                                          |
| 17. Hayle <i>et al.</i> (2013)       | 8 patients with advanced COPD who were accessing specialist palliative care from one area in the UK.                                                                                          | Semi-structured interviews.<br>Phenomenological approach                                                            |
| 18. Hynes <i>et al.</i> (2012)       | 11 family caregivers of people with advanced COPD in the Republic of Ireland                                                                                                                  | Semi-structured interviews                                                                                          |
| 19. Janssen <i>et al.</i> (2010)     | 2 case studies of patients with advanced COPD and 1 with a patient with pulmonary fibrosis in the Netherlands.                                                                                | Case studies of patients part of an interdisciplinary palliative care program                                       |
| 20. Kanervisto <i>et al.</i> (2007)  | 5 people with severe COPD and 4 of their spouses in Finland.                                                                                                                                  | Semi-structured interviews                                                                                          |
| 21. Lowey <i>et al.</i> (2013)       | 10 patients with advanced COPD and 10 patients with advanced heart failure in a primary care setting in New York                                                                              | Semi-structured interviews                                                                                          |
| 22. Mc Veigh <i>et al.</i> (2017a)   | 17 bereaved family carers of patients with ILD, bronchiectasis or COPD, and 18 HCPs involved in the care of patients with NMRD in rural and urban areas of the North and Republic of Ireland. | Semi-structured interviews and focus groups                                                                         |
| 23. Mc Veigh <i>et al.</i> (2017b)   | 17 bereaved family carers of patients with ILD, bronchiectasis or COPD, and 18 HCPs involved in the care of patients with NMRD in rural and urban areas of the North and Republic of Ireland. | Semi-structured interviews and focus groups                                                                         |
| 24. Mac Pherson <i>et al.</i> (2013) | 10 patients with severe COPD from the primary and secondary care setting in the UK.                                                                                                           | Semi-structured interviews.<br>Grounded theory approach.                                                            |
| 25. Nguyen <i>et al.</i> (2013)      | 12 people with moderate to severe COPD from an outpatient clinic in Canada.                                                                                                                   | Semi-structured interviews and participants watched a DVD within the interview that covered end of life care topics |
| 26. Philip <i>et al.</i> (2012)      | 10 patients with advanced COPD and 31 HCPs (18 nurses, 7 doctors and 6 AHPs) in Australia                                                                                                     | Semi-structured interviews with patients and 5 focus groups with HCPs                                               |
| 27. Philip <i>et al.</i> (2014)      | 9 active and 10 bereaved carers of patients with severe COPD in Australia                                                                                                                     | Semi-structured interviews                                                                                          |
| 28. Pinnock <i>et al.</i> (2011)     | 21 patients with severe COPD, 13 informal carers and 18 professional carers, from primary and secondary care setting in Scotland                                                              | Longitudinal multi-perspective qualitative study (18 month period up to 4 interview)                                |

|                                   |                                                                                                                                                                                   |                                                                                   |
|-----------------------------------|-----------------------------------------------------------------------------------------------------------------------------------------------------------------------------------|-----------------------------------------------------------------------------------|
|                                   |                                                                                                                                                                                   |                                                                                   |
| 29. Reinke <i>et al.</i> (2008)   | Physicians (n= 31) Nurses (n= 25) Patients with advanced COPD (n= 24), advanced lung cancer (n= 30), COPD and cancer (n= 1) and their family members (n= 36) conducted in the USA | Semi-structured interviews, grounded theory                                       |
| 30. Reinke <i>et al.</i> (2011)   | 7 patients with advanced COPD in the USA                                                                                                                                          | Semi-structured interviews                                                        |
| 31. Reticker <i>et al.</i> (2012) | 2 patients with advanced COPD in the USA                                                                                                                                          | Case study based approach                                                         |
| 32. Sampson <i>et al.</i> (2015)  | 27 patients with IPF and 21 family carers in the UK                                                                                                                               | Semi-structured interviews                                                        |
| 33. Schroedl <i>et al.</i> (2014) | 20 patients with severe COPD in America                                                                                                                                           | Semi-structured interviews                                                        |
| 34. Simpson <i>et al.</i> (2010)  | 14 active family carers of patients with advance COPD in Canada                                                                                                                   | Semi-structured interviews                                                        |
| 35. Spence <i>et al.</i> (2008)   | 7 active carers of patients with severe COPD in Northern Ireland                                                                                                                  | Semi-structured interviews                                                        |
| 36. Spence <i>et al.</i> (2009)   | 23 healthcare professionals involved in care of COPD in Northern Ireland                                                                                                          | Semi-structured interviews with 17 HCPs and 6 semi structured interviews with GPs |

### Quantitative

| <b><i>Study</i></b>               | <b><i>Population</i></b>                                                                         | <b><i>Methods</i></b>                                                                                               |
|-----------------------------------|--------------------------------------------------------------------------------------------------|---------------------------------------------------------------------------------------------------------------------|
| 1. Au <i>et al.</i> (2012)        | 306 patients with advanced COPD in America. Outpatient setting.                                  | Randomised controlled trial to assess impact of patient specific feedback form regarding end of life conversations. |
| 2. Bajwah <i>et al.</i> (2012)    | 45 patients with interstitial lung disease (pulmonary fibrosis) from the UK                      | Retrospective documentary analysis of patients hospital notes                                                       |
| 3. Batzlaff <i>et al.</i> (2014)  | 591 patients with COPD from an ICU in America                                                    | Retrospective documentary analysis of patients hospital notes over a 14 year period                                 |
| 4. Bausewein <i>et al.</i> (2010) | 49 patients with lung cancer and 60 patients with advanced COPD in Germany                       | Cross sectional questionnaire study                                                                                 |
| 5. Beernaert <i>et al.</i> (2013) | 111 patients with COPD, 88 with heart failure, 325 with dementia and 673 with cancer in Belgium. | Population-based retrospective survey studying                                                                      |

|                                    |                                                                                                                             |                                                                                                                                  |
|------------------------------------|-----------------------------------------------------------------------------------------------------------------------------|----------------------------------------------------------------------------------------------------------------------------------|
|                                    |                                                                                                                             | deaths registered in Belgium by GPs                                                                                              |
| 6. Benzo <i>et al.</i> (2013)      | 1218 patients with severe COPD in the USA                                                                                   | Clinical data and patient self-report surveys                                                                                    |
| 7. Blinderman <i>et al.</i> (2009) | 100 patients in the USA with advanced COPD                                                                                  | Longitudinal Prospective survey study                                                                                            |
| 8. Boland <i>et al.</i> (2013)     | 16 patients with severe COPD in the UK                                                                                      | Survey and documentary analysis                                                                                                  |
| 9. Buxton <i>et al.</i> (2010)     | 239 acute hospital units admitting patients with COPD in the UK                                                             | National survey/audit                                                                                                            |
| 10. Chandra and Chandran (2014)    | COPD inpatient admissions with exacerbations in America                                                                     | Retrospectively reviewed inpatient data over an 8 year period for over 3000 admissions. Linear regression analysis was conducted |
| 11. Chou <i>et al.</i> (2013)      | 103 patients with COPD and 43 with lung cancer in Taiwan                                                                    | Retrospective hospital data                                                                                                      |
| 12. Fahim and Kastelik (2014)      | 30 patients with advanced COPD in the UK                                                                                    | Questionnaire study                                                                                                              |
| 13. Farquhar <i>et al.</i> (2016)  | 87 patients with NMRD in the UK                                                                                             | Randomised controlled trial                                                                                                      |
| 14. Gaspar <i>et al.</i> (2014)    | 136 pulmonologists in Portugal involved in care of patients with advanced COPD                                              | Online questionnaire                                                                                                             |
| 15. Goodridge <i>et al.</i> (2008) | 433 patients who had died with a diagnosis of lung cancer and 602 patients who had died with a diagnosis of COPD. In Canada | Retrospective cohort study                                                                                                       |
| 16. Goodridge <i>et al.</i> (2010) | 1098 patients who died from respiratory illness in Canada                                                                   | Cohort study retrospectively investigating healthcare data                                                                       |
| 17. Habraken <i>et al.</i> (2009)  | COPD (n=82) compared to patients with advanced lung cancer (n= 19) in the USA                                               | Questionnaires                                                                                                                   |
| 18. Higginson <i>et al.</i> (2014) | 57 patients with COPD, 19 ILD, 21 cancer, 5 Heart failure and 3 other. From the UK                                          | Randomised Controlled Trial                                                                                                      |
| 19. Janssen <i>et al.</i> (2011)   | 105 outpatients with severe COPD                                                                                            | Observational study – using visual analogue scales                                                                               |
| 20. Leung <i>et al.</i> (2012)     | 376 patients with moderate to severe COPD in America                                                                        | Cross-sectional study using validated self-reporting questionnaires                                                              |
| 21. Lindell <i>et al.</i> (2015)   | 277 patients with ILD in the USA                                                                                            | Retrospective data                                                                                                               |

|                                       |                                                                                      |                                                                               |
|---------------------------------------|--------------------------------------------------------------------------------------|-------------------------------------------------------------------------------|
| 22. Maric <i>et al.</i> (2016)        | 100 patients with advanced lung cancer and 100 patients with advanced COPD in Serbia | Cross sectional cohort study                                                  |
| 23. Matsunuma <i>et al.</i> (2016)    | 23 patients with ILD and 59 patients with lung cancer in India                       | Retrospective data                                                            |
| 24. Partridge <i>et al.</i> (2009)    | 107 respiratory physicians across England, Ireland and Wales                         | Questionnaire                                                                 |
| 25. Philip <i>et al.</i> (2012)       | 22019 Patients with COPD from an ICU in Australia                                    | Retrospective cohort study of patients data                                   |
| 26. Roberts <i>et al.</i> (2008)      | 100 acute NHS hospitals across the UK                                                | Survey investigating existing care and quality of care for patients with COPD |
| 27. Rush <i>et al.</i> (2017)         | 181,689 patients with COPD in the USA                                                | Retrospective nationwide cohort analysis                                      |
| 28. Slatore <i>et al.</i> (2010)      | 342 veterans with COPD in the USA                                                    | Randomised Controlled Trial                                                   |
| 29. Smith <i>et al.</i> (2014)        | 17 respiratory physicians in Australia                                               | Pilot – questionnaire                                                         |
| 30. Strang <i>et al.</i> (2013)       | 93 respiratory physicians in Sweden                                                  | Online questionnaire                                                          |
| 31. Tsim and Davidson (2014)          | Patients with COPD and Lung Cancer in Scotland                                       | Retrospective cohort study of patients data                                   |
| 32. Weingaertner <i>et al.</i> (2014) | Patients with lung cancer (n=32) and advanced COPD (n=50) in the UK                  | Prospective longitudinal cohort study                                         |
| 33. White <i>et al.</i> (2011)        | 163 patients with severe COPD in the UK                                              | Cross- sectional study using HADS                                             |
| 34. Wysham <i>et al.</i> (2015)       | 152 patients with Lung Cancer and 86 patients with a Chronic Lung Disease            | Retrospective cohort study of patients data                                   |
